# Supplementary material
Source: MDPI journal article supplement (https://www.mdpi.com/2311-553X/8/1/15)

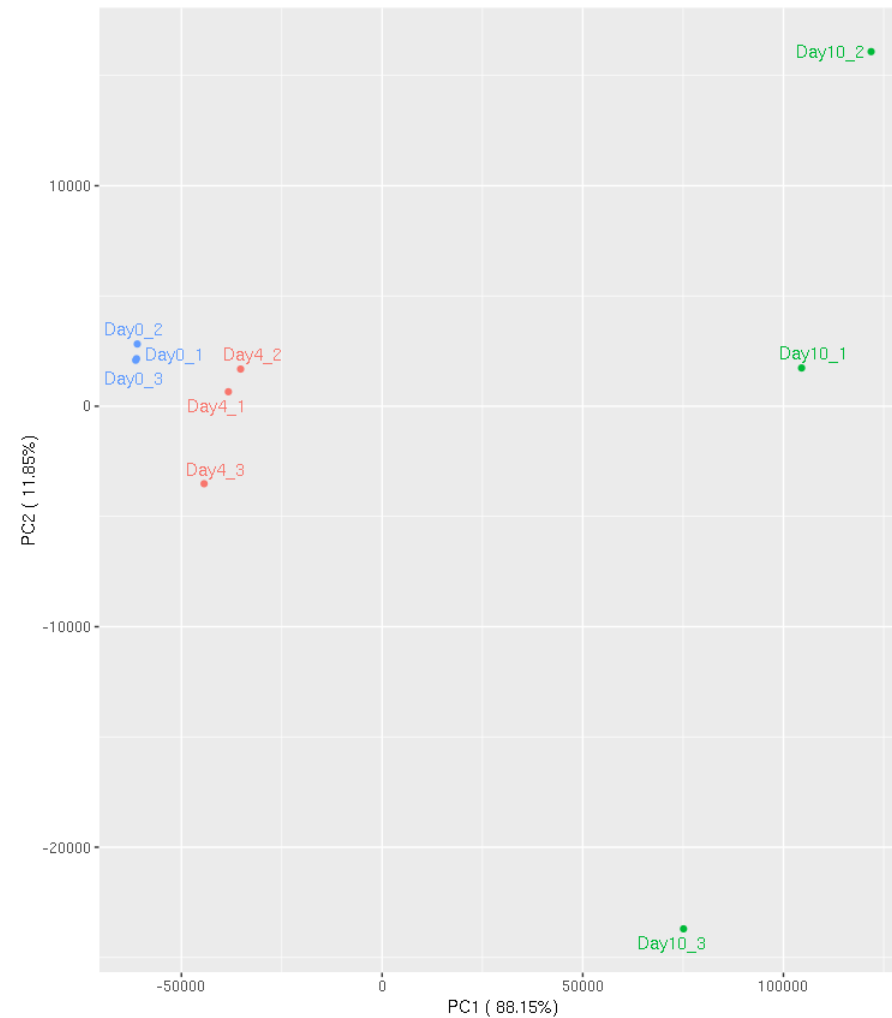

**Supplemental Figure S1.** Differentiation stage-specific transcript expression. Principal component analysis (PCA) shows that B cells cluster according to their activation state from D0 (blue), D4 (red) and D10 IVPCs (green).

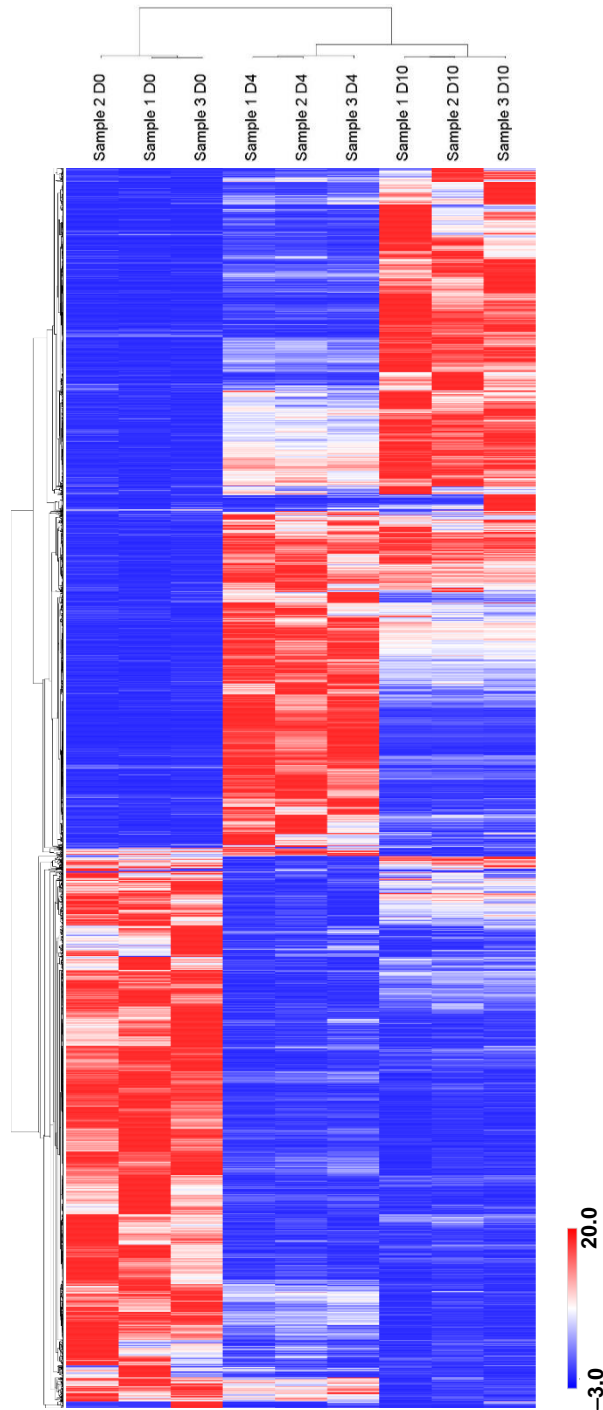

**Supplemental Figure S2.** Hierarchical clustering of differentially expressed transcripts during the differentiation from D0 resting B cells to D10 IVPCs. Differentially expressed transcripts based on fold change (FC)  $\geq 2.0$  and false discovery rate (FDR)  $\leq 0.05$  when including all transcripts. were analyzed by Morpheus software for hierarchical clustering using log2 transformed pseudo-counts and Pearson correlation. The color scale bar represents relative expression based on log2 transformed pseudo-counts.

## Biological Processes Upregulated in IVPCs

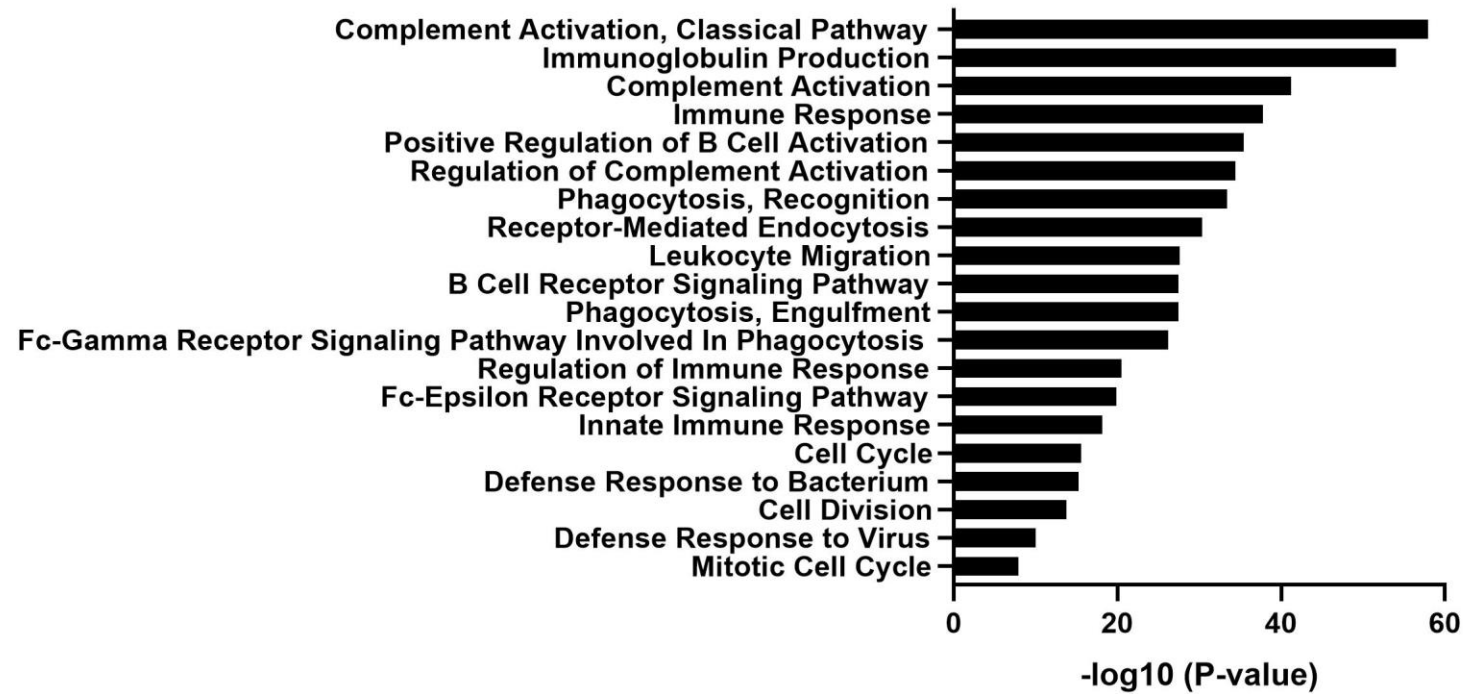

**Supplemental Figure S3A.** Gene ontology (GO) annotation of upregulated transcripts. D10 IVPC upregulated transcripts are involved in complement activation, immunoglobulin production and immune response. The top 20 Biological Processes are shown.

## Biological Processes Downregulated in IVPCs

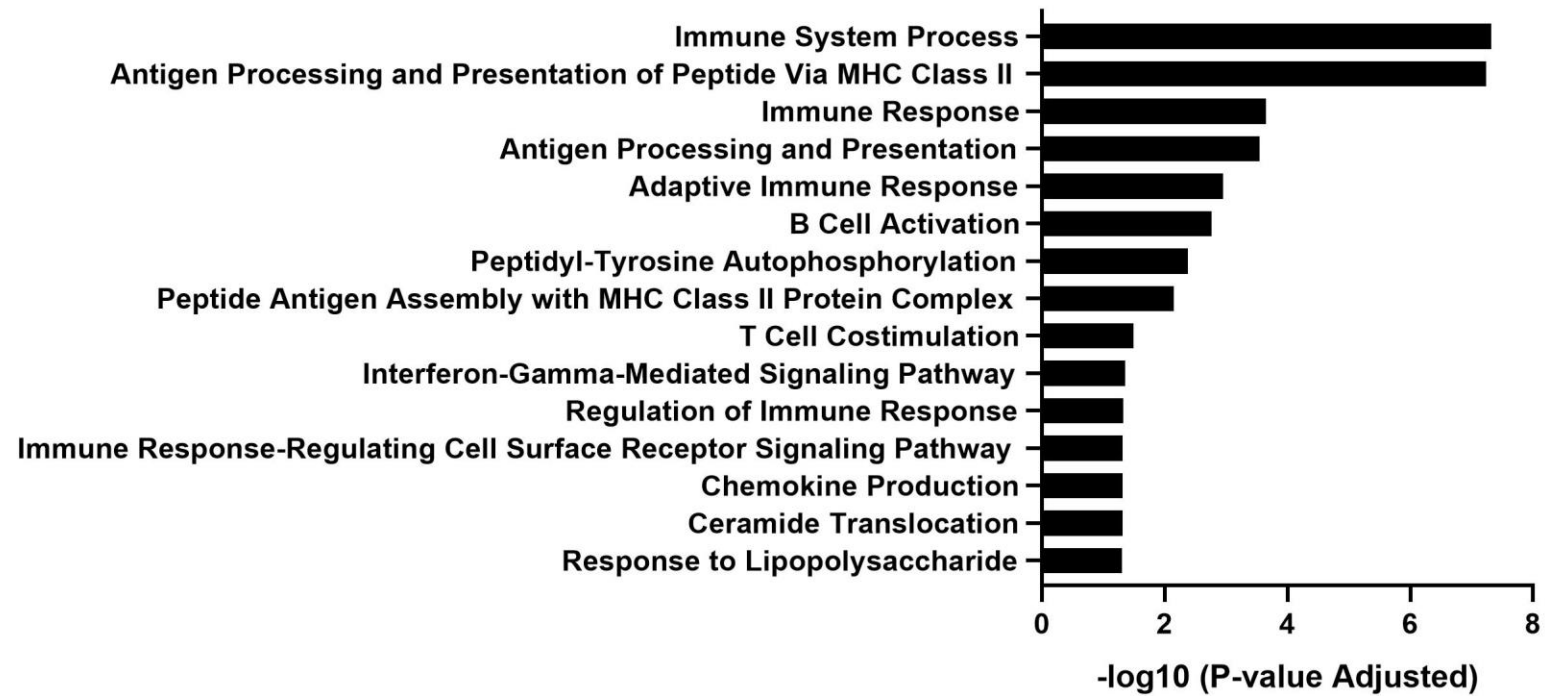

**Supplemental Figure S3B.** GO annotation of downregulated transcripts. D10 IVPC downregulated transcripts are involved in immune response, antigen response and B cell activation.

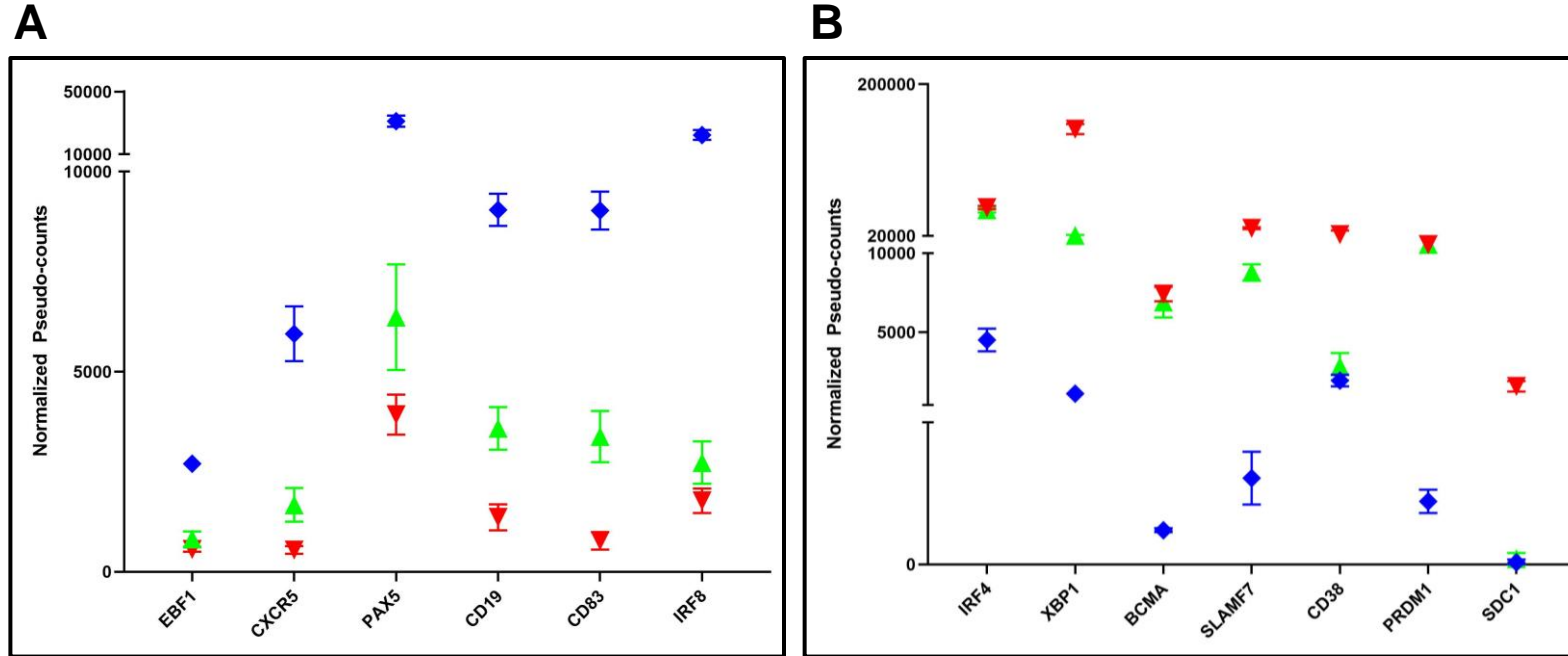

**Supplemental Figure S4.** Regulation of transcription factors and specific genes in B cell differentiation. Expression of transcription factors and genes known to be **(A)** downregulated; and **(B)** upregulated in B cell differentiation to PCs *in vivo* are also significantly down- or up-regulated in IVPCs ( $p < 0.0001$ ). D0 = blue; D4 = green; D10 IVPCs = red ( $n=3$ ).

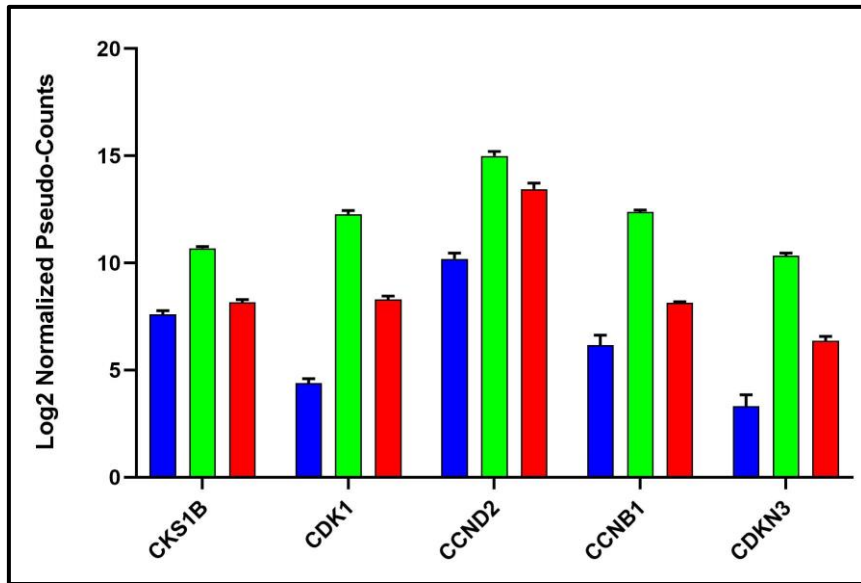

**Supplemental Figure S5.** Cell cycle transcripts in B cell differentiation. Representative cell cycle transcripts followed the pattern of low expression in D0 B cells, increased expression in D4 plasmablasts and decreased expression in D10 IVPCs. D0 = blue; D4 = green; D10 IVPCs = red (n=3).

**Supplemental Figure S6.** Representative ncRNAs located in Ig loci and their respective known or suggested associated protein-coding genes. **(A)** Linc00152 on chr2, **(B)** RP11-731F5.2 on chr14, and **(C)** pri-miR-650 on chr22.

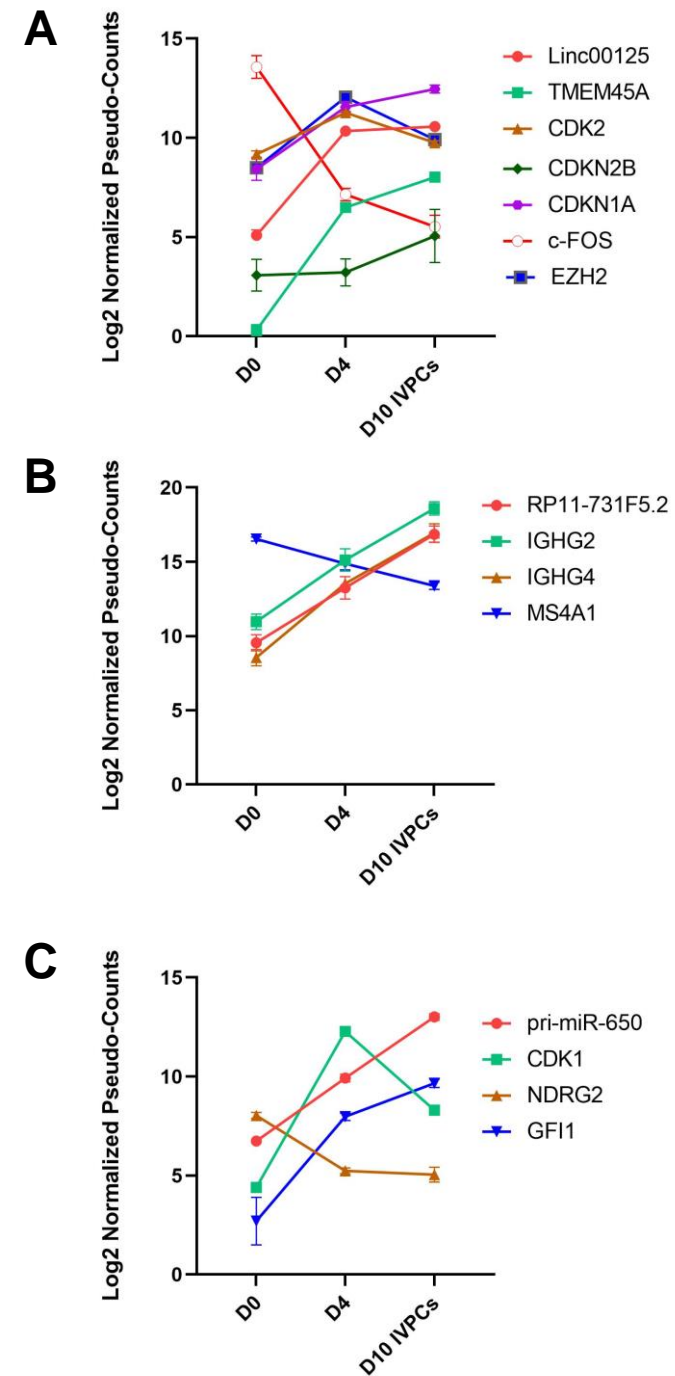

Supplement: s1 [file s1]
