# Supplementary material
Source: MDPI journal article supplement (https://www.mdpi.com/2311-553X/8/1/15)
Supplement: s1 [file s1]

**Supplemental Table S1.** Top 100 differentially expressed protein-coding transcripts (excluding Ig transcripts) as clustered in Figure 3.

| Upregulated Transcripts | Ensembl ID      | FC          | p-value* | Downregulated Transcripts | Ensembl ID      | FC           | p-value  |
|-------------------------|-----------------|-------------|----------|---------------------------|-----------------|--------------|----------|
| OTOF                    | ENSG00000115155 | <b>9.0</b>  | 4.92E-05 | BCL11B                    | ENSG00000127152 | -5.3         | 5.38E-03 |
| KIF19                   | ENSG00000196169 | <b>10.0</b> | 8.49E-11 | IFI44L                    | ENSG00000137959 | -5.1         | 2.34E-12 |
| SERPING1                | ENSG00000149131 | <b>9.6</b>  | 6.60E-09 | NKX6-3                    | ENSG00000165066 | -7.3         | 8.62E-10 |
| NCMAP                   | ENSG00000184454 | <b>8.9</b>  | 2.17E-12 | GRIK3                     | ENSG00000163873 | <b>-7.8</b>  | 1.23E-06 |
| IFIT1B                  | ENSG00000204010 | <b>8.7</b>  | 1.27E-08 | AK8                       | ENSG00000165695 | <b>-7.8</b>  | 1.22E-09 |
| SCNN1B                  | ENSG00000168447 | <b>9.2</b>  | 2.92E-14 | SDR16C5                   | ENSG00000170786 | <b>-7.0</b>  | 3.90E-07 |
| QPRT                    | ENSG00000103485 | <b>8.3</b>  | 8.90E-15 | DAZL                      | ENSG00000092345 | <b>-7.2</b>  | 7.17E-09 |
| SDC1                    | ENSG00000115884 | <b>8.4</b>  | 1.80E-08 | LCN6                      | ENSG00000204003 | -4.2         | 2.11E-13 |
| CARD17                  | ENSG00000255221 | <b>9.9</b>  | 1.54E-10 | MYZAP                     | ENSG00000263155 | <b>-9.0</b>  | 1.37E-13 |
| LAG3                    | ENSG00000089692 | <b>8.9</b>  | 3.05E-13 | FBLN2                     | ENSG00000163520 | <b>-8.1</b>  | 3.72E-13 |
| IFI27                   | ENSG00000165949 | <b>9.7</b>  | 4.76E-21 | GDF7                      | ENSG00000143869 | <b>-6.5</b>  | 1.29E-13 |
| LIF                     | ENSG00000128342 | <b>9.9</b>  | 3.97E-02 | S100A8                    | ENSG00000143546 | <b>-7.6</b>  | 3.30E-06 |
| PIR                     | ENSG00000087842 | <b>10.7</b> | 1.68E-11 | STK32B                    | ENSG00000152953 | <b>-7.2</b>  | 1.70E-06 |
| LRRC2                   | ENSG00000163827 | <b>9.3</b>  | 5.78E-09 | LCN15                     | ENSG00000177984 | -5.0         | 4.83E-07 |
| IGF1                    | ENSG00000017427 | <b>8.9</b>  | 3.12E-17 | SGSM1                     | ENSG00000167037 | <b>-6.6</b>  | 3.08E-09 |
| WNT5B                   | ENSG00000111186 | <b>9.8</b>  | 1.00E-13 | SEMA3D                    | ENSG00000153993 | -5.3         | 2.34E-09 |
| P2RY6                   | ENSG00000171631 | <b>8.6</b>  | 5.24E-13 | BMP3                      | ENSG00000152785 | <b>-10.0</b> | 2.15E-10 |
| S1PR2                   | ENSG00000267534 | <b>8.7</b>  | 4.01E-11 | NFAM1                     | ENSG00000235568 | -4.3         | 2.08E-11 |
| CHAC1                   | ENSG00000128965 | <b>8.4</b>  | 7.68E-15 | LRRC70                    | ENSG00000186105 | <b>-4.7</b>  | 1.97E-10 |
| HTR4                    | ENSG00000164270 | <b>10.9</b> | 2.89E-11 | KLF4                      | ENSG00000136826 | <b>-7.3</b>  | 2.42E-14 |
| EFEMP1                  | ENSG00000115380 | <b>8.4</b>  | 3.39E-07 | GALNTL6                   | ENSG00000174473 | <b>-9.7</b>  | 1.15E-08 |
| AC136616.2              | ENSG00000277761 | <b>10.3</b> | 3.60E-10 | ZNF703                    | ENSG00000183779 | <b>-6.6</b>  | 2.82E-12 |
| KCNA2                   | ENSG00000177301 | <b>8.5</b>  | 9.31E-16 | MDS2                      | ENSG00000197880 | <b>-8.2</b>  | 3.22E-12 |
| IGJ                     | ENSG00000132465 | <b>8.4</b>  | 1.41E-16 | ZDHHC19                   | ENSG00000163958 | <b>-7.2</b>  | 1.38E-13 |
| ZNF697                  | ENSG00000143067 | 8.9         | 2.12E-13 | RGS7                      | ENSG00000182901 | <b>-9.4</b>  | 7.39E-10 |
| TSHR                    | ENSG00000165409 | <b>8.9</b>  | 1.37E-12 | GRASP                     | ENSG00000161835 | <b>-7.3</b>  | 3.40E-13 |
| HRASLS2                 | ENSG00000133328 | 8.6         | 3.30E-11 | FOSB                      | ENSG00000125740 | <b>-6.8</b>  | 4.97E-09 |
| NLRP7                   | ENSG00000167634 | 8.8         | 2.92E-08 | FOS                       | ENSG00000170345 | <b>-8.0</b>  | 7.11E-10 |
| IGSF3                   | ENSG00000143061 | 9.1         | 1.82E-11 | KIAA1683                  | ENSG00000130518 | <b>-5.2</b>  | 2.99E-16 |
| TNFRSF9                 | ENSG00000049249 | 9.1         | 5.19E-13 | IRS2                      | ENSG00000185950 | -4.8         | 2.34E-15 |
| NEIL3                   | ENSG00000109674 | 8.8         | 1.57E-13 | DUSP1                     | ENSG00000120129 | -7.7         | 1.42E-17 |
| UNC13C                  | ENSG00000137766 | 9.2         | 7.30E-09 | CYGB                      | ENSG00000161544 | -4.6         | 3.86E-09 |
| HIST1H3C                | ENSG00000278272 | 9.0         | 1.09E-08 | DOK7                      | ENSG00000175920 | -4.9         | 1.05E-10 |
| CDC6                    | ENSG00000094804 | 8.8         | 4.62E-19 | GPA33                     | ENSG00000143167 | -7.2         | 5.15E-12 |
| HPGD                    | ENSG00000164120 | 8.5         | 9.58E-16 | P2RY14                    | ENSG00000174944 | <b>-8.1</b>  | 1.85E-16 |
| HJURP                   | ENSG00000123485 | 9.1         | 8.54E-17 | SLC11A1                   | ENSG00000018280 | -4.7         | 4.56E-10 |
| MCM10                   | ENSG00000065328 | 9.7         | 1.48E-17 | DUSP8                     | ENSG00000184545 | -5.0         | 3.28E-10 |
| DEPDC1                  | ENSG00000024526 | 9.4         | 1.15E-16 | ESPNL                     | ENSG00000144488 | -5.8         | 9.36E-09 |
| KIF18B                  | ENSG00000186185 | 8.7         | 1.89E-17 | ZNF618                    | ENSG00000157657 | -6.3         | 3.52E-14 |
| ANLN                    | ENSG00000011426 | 8.6         | 1.90E-17 | ARRDC4                    | ENSG00000140450 | -5.3         | 1.65E-13 |
| DLGAP5                  | ENSG00000126787 | 9.8         | 1.75E-18 | VPREB3                    | ENSG00000128218 | -5.5         | 1.33E-15 |
| SPC25                   | ENSG00000152253 | 8.8         | 1.41E-16 | CLEC4C                    | ENSG00000198178 | -7.0         | 4.83E-11 |
| CEP55                   | ENSG00000138180 | 9.4         | 3.36E-19 | SYN3                      | ENSG00000185666 | -6.3         | 2.74E-11 |
| TICRR                   | ENSG00000140534 | 8.7         | 6.46E-18 | IL13RA1                   | ENSG00000131724 | -5.2         | 1.88E-15 |
| KIF14                   | ENSG00000118193 | 9.0         | 2.18E-17 | PRCD                      | ENSG00000214140 | -5.5         | 1.06E-13 |
| BIRC5                   | ENSG00000089685 | 8.6         | 1.07E-19 | ZCCHC18                   | ENSG00000166707 | -5.0         | 4.39E-14 |
| KIF23                   | ENSG00000137807 | 8.5         | 1.13E-19 | DNAJB13                   | ENSG00000187726 | -4.8         | 7.36E-15 |
| RRM2                    | ENSG00000171848 | 9.2         | 8.60E-17 | ZBTB16                    | ENSG00000109906 | -8.9         | 7.46E-16 |
| MKI67                   | ENSG00000148773 | 8.9         | 4.61E-21 | MEGF6                     | ENSG00000162591 | -5.5         | 8.11E-16 |
| CDC20                   | ENSG00000117399 | 8.5         | 3.22E-20 | GPRASP1                   | ENSG00000198932 | -5.0         | 1.75E-14 |

\*p-value based on ANOVA-like QL F-test; Bold FC values indicate FC from D0 vs D10 IVPCs; Not bolded FC values indicate FC from D0 vs D4
